# Supplementary material for: From boron clusters to gold clusters: new label-free colorimetric sensors
Source: Royal Society of Chemistry journal article supplement (doi:10.1039/c7cc06607d), 2017-01-01
Supplement: c7cc06607d1.pdf [file c7cc06607d1.pdf]

# Electronic Supplementary Information

## From boron cluster to gold cluster: A New Label-free Colorimetric Sensors

Bin Qi, Chenchen Wu, Ling Xu, Wenjing Wang, Jin Cao, Jun Liu, Shuai Zhang, Detlef Gabel,  
Haibo Zhang\* and Xiaohai Zhou\*

*College of Chemistry and Molecular Sciences, Wuhan University, Wuhan, 430072, China.*

### Table of Contents

|                                                                                                                                                                         |     |
|-------------------------------------------------------------------------------------------------------------------------------------------------------------------------|-----|
| 1. General materials and methods.....                                                                                                                                   | S2  |
| 2. General procedures for AuNPs formation.....                                                                                                                          | S3  |
| 3. Analytical data of [ <i>closo</i> -B <sub>12</sub> H <sub>12</sub> ] <sup>2-</sup> -capped AuNPs .....                                                               | S3  |
| 4. Phase transfer of [ <i>closo</i> -B <sub>12</sub> H <sub>12</sub> ] <sup>2-</sup> -capped Au nanoparticles via exchanging cations of boron cluster.....              | S8  |
| 5. General procedures for Cr (III) and Pb (II) detection .....                                                                                                          | S8  |
| 6. Analytical data of Cr (III) and Pb (II) detection based on [ <i>closo</i> -B <sub>12</sub> H <sub>12</sub> ] <sup>2-</sup> -capped AuNPs.....                        | S9  |
| 7. [ <i>closo</i> -B <sub>12</sub> H <sub>12</sub> ] <sup>2-</sup> -capped PtNPs and [ <i>closo</i> -B <sub>12</sub> H <sub>12</sub> ] <sup>2-</sup> -capped AgNPs..... | S12 |
| 8. List of methods of colorimetric detection of Pb <sup>2+</sup> and Cr <sup>3+</sup> .....                                                                             | S13 |
| 9. References .....                                                                                                                                                     | S13 |

## 1. General materials and methods

**Materials and reagents:** Hydrogen tetrachloride gold(III) tetrahydrate ( $\text{HAuCl}_4 \cdot 4\text{H}_2\text{O}$ , 99.99%) and cesium closo-dodecaborate ( $\text{Cs}_2[\text{closo-B}_{12}\text{H}_{12}]$ , 98%) were respectively purchased from Sinopharm Chemical Reagent Co., Ltd (Shanghai, China) and Strem Chemicals (Newburyport, USA).  $\text{MnCl}_2 \cdot 4\text{H}_2\text{O}$ ,  $\text{FeCl}_3 \cdot 4\text{H}_2\text{O}$ ,  $\text{Hg}(\text{NO}_3)_2 \cdot 2\text{H}_2\text{O}$ ,  $\text{CoCl}_2 \cdot 6\text{H}_2\text{O}$ ,  $\text{MgSO}_4$ ,  $\text{CaCl}_2 \cdot 2\text{H}_2\text{O}$ ,  $\text{AlCl}_3$ ,  $\text{CrCl}_3 \cdot 6\text{H}_2\text{O}$ ,  $\text{BaCl}_2$  and  $\text{Pb}(\text{NO}_3)_2$  were all of analytical grade and sourced from Aladdin Reagent (Shanghai, China). All metal ion reagents were prepared freshly before the experiment. To improve the sensitivity, 0.05 M of NaCl was added before the addition of metal ions. Reagent-grade NaOH (0.1 M) was used to adjust the pH value of solutions. Milli-Q ultra-pure water ( $18 \text{ M}\Omega \text{ cm}^{-1}$ ) was used to prepare all the solutions throughout the experiments.

**Transmission electron microscopy (TEM)** images were captured on a JEM-2100 microscope operated at 200 kV.

**Scanning electron microscopy (SEM)** images were taken on a field-emission microscope (Zeiss Sigma) operated at an accelerating voltage of 20 kV.

**ESI-MS spectra** were taken at room temperature on a mass spectrometer (Finnigan LCQ advantage; Thermo Fisher Scientific).

**Ultraviolet-visible (UV-vis)** extinction spectra were taken at room temperature on a spectrophotometer (TU-1901; Persee, Beijing, China) by use of quartz cuvettes with an optical path length of 1 cm.

**X-ray powder diffraction (XRD)** patterns were recorded on a Rigaku SmartLab diffractometer with a  $\text{Cu-K}\alpha$  radiation source ( $\lambda = 1.54184 \text{ \AA}$ ).

**X-ray photoelectron spectra (XPS)** were recorded using an electron spectroscope (Escalab 250Xi; Thermo Fisher Scientific) with an  $\text{Al-K}\alpha$  source (15 kV and 10 mA).

**IR spectra** were measured using a KBr plate in a Fourier transformation infrared (FTIR) spectrometer (Nexus 670; Thermo Nicolet Corporation, USA).

**Zeta-potential** was measured with a Zetasizer analyzer (Zen 3600; Malvern Instruments Ltd., Worcestershire, UK).

**Microcalorimetric titration** of lead ions with  $[\text{closo-B}_{12}\text{H}_{12}]^{2-}$  (pH = 11) was measured with a VP-ITC Microcalorimeter (Microcal Inc., USA).

The Au ions were quantified using an inductively coupled plasma atomic emission spectrometer (ICP-AES) (IRIS Intrepid II ; Thermo Elemental, Franklin, USA).

## 2. General procedures for AuNPs formation

General procedure for the formation of  $[closo-B_{12}H_{12}]^{2-}$ -capped AuNPs with an average diameter of 15 nm: 1 mL of  $HAuCl_4 \cdot 4H_2O$  (0.05 M) and 1 mL of  $Cs_2[closo-B_{12}H_{12}]$  (0.05 M) was added to  $H_2O$  at room temperature. The mixture turned faint red immediately and then stirred for 30 min continuously. The free  $Cs_2[closo-B_{12}H_{12}]$  in solution was removed by centrifugation at 12000 rpm for 15 min. The collected nanoparticle samples were washed and dispersed in  $H_2O$ .

## 3. Analytical data of $[closo-B_{12}H_{12}]^{2-}$ -capped AuNPs

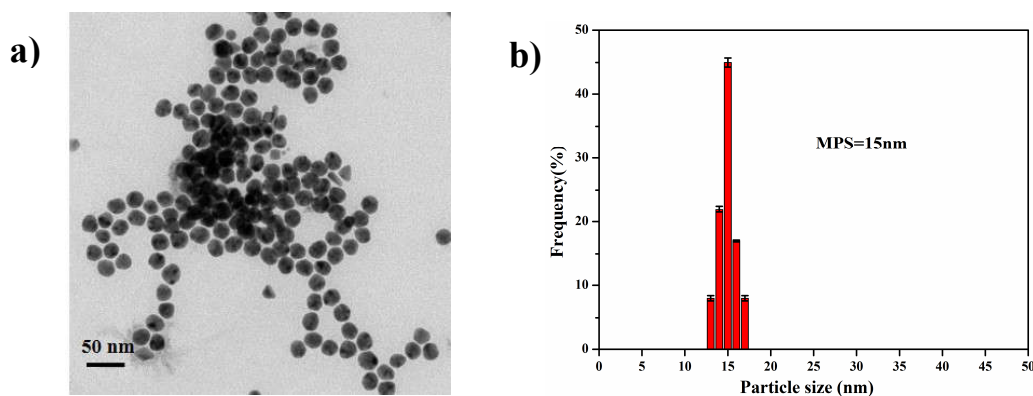

**Figure S1.** a) TEM micrograph of the AuNPs when the molar ratio of  $Cs_2[closo-B_{12}H_{12}]$  to  $HAuCl_4$  is 1; b) the corresponding particle size distribution. MPS is the mean particle size.

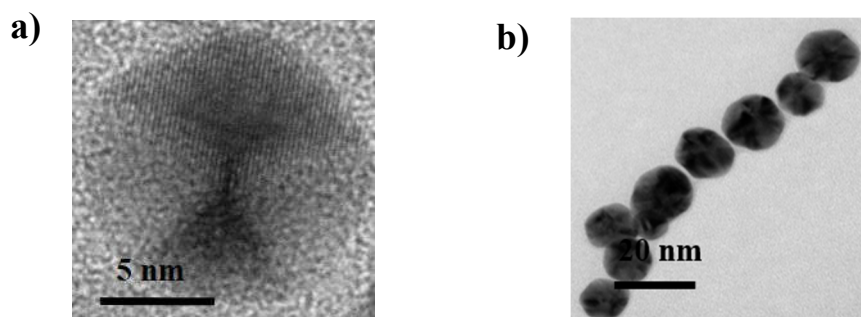

**Figure S2.** The HR-TEM (a) and TEM (B) images of AuNPs with defects—stacking faults and lattice distortions.

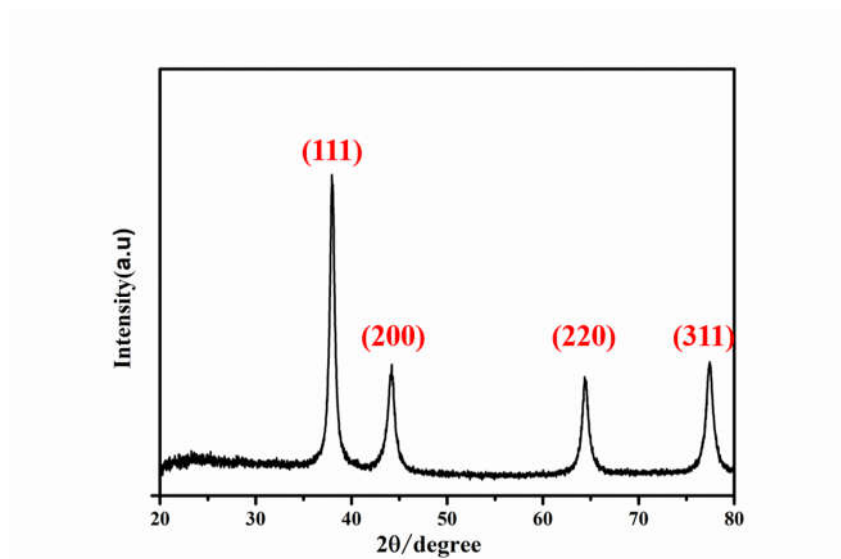

**Figure S3.** The X-ray diffraction (XRD) pattern spectrum of  $[\text{closo-B}_{12}\text{H}_{12}]^{2-}$ -capped AuNPs collected by centrifugation and vacuum drying.

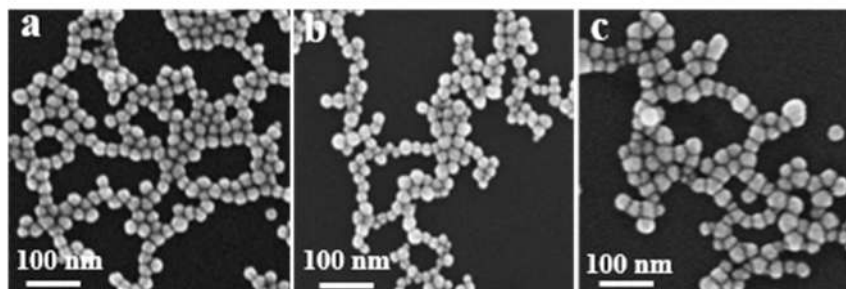

**Figure S4.** The SEM images of AuNPs at different concentration of  $\text{HAuCl}_4$  with equal molar ratio of  $[\text{closo-B}_{12}\text{H}_{12}]^{2-}$  to  $\text{HAuCl}_4$  kept at 0.5: (a)  $5 \times 10^{-4}$  M, (b)  $2 \times 10^{-3}$  M, (c)  $4 \times 10^{-3}$  M.

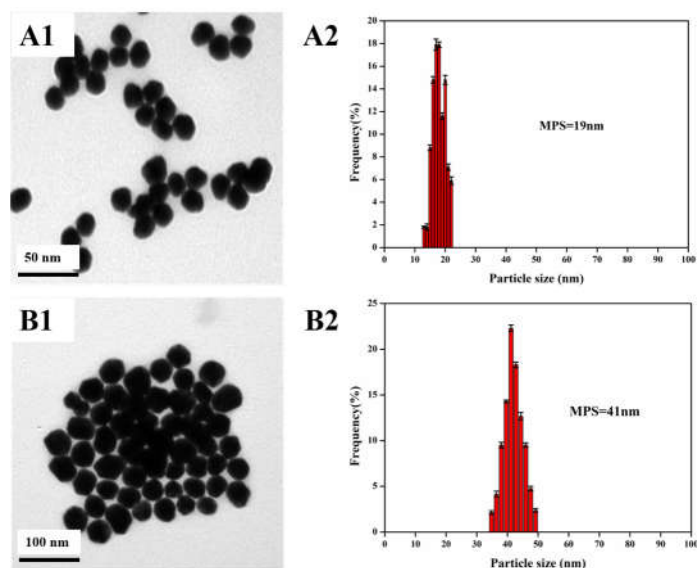

**Figure S5.** The TEM images of AuNPs at different molar ratio of  $[\text{closo-B}_{12}\text{H}_{12}]^{2-}$  to  $\text{HAuCl}_4$  with the same concentration of  $\text{HAuCl}_4$  kept at  $5 \times 10^{-4}$  M: (A) 0.7; (B) 0.4.

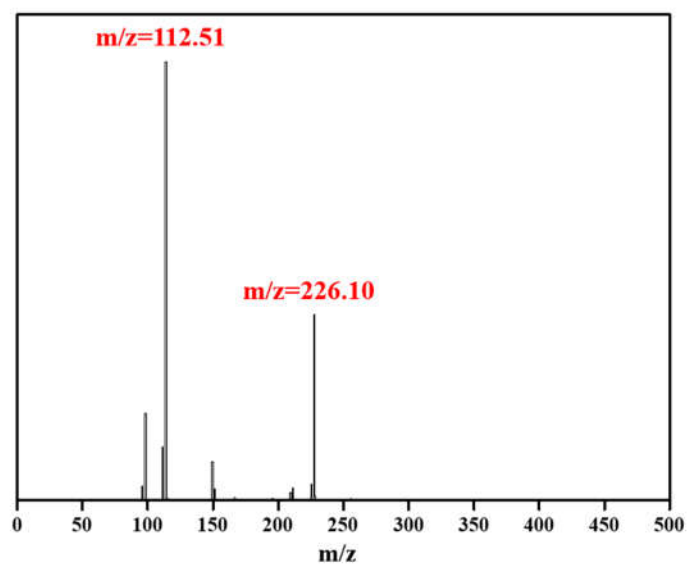

**Figure S6.** The ESI-MS spectrum of the oxidative products of  $[\text{closo-B}_{12}\text{H}_{12}]^{2-}$ .

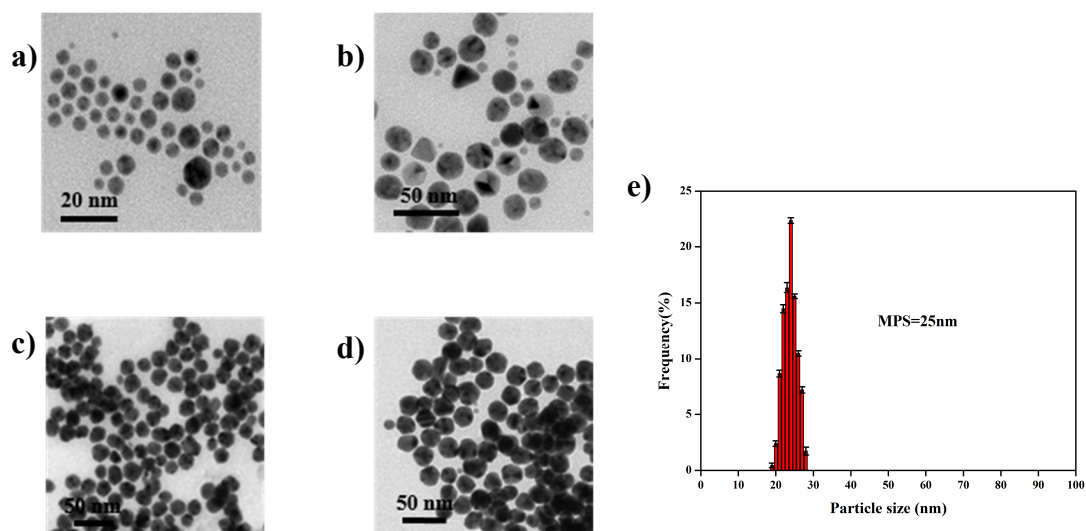

**Figure S7.** Time-dependent TEM micrographs over the course of reaction time when the molar ratio of  $\text{Cs}_2[\text{closo-B}_{12}\text{H}_{12}]$  to  $\text{HAuCl}_4$  is 0.5: (a) 60s, (b) 5min, (c) 10min, (d) 30min; (e) the corresponding particle size distribution of (d).

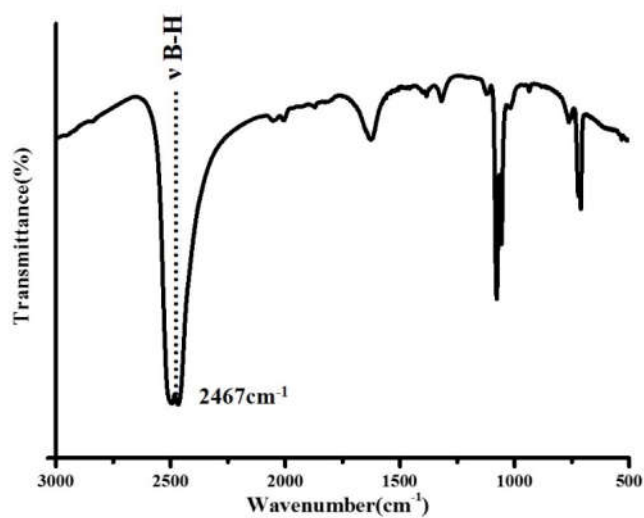

**Figure S8.** The FT-IR spectrum of  $[closo-B_{12}H_{12}]^{2-}$ -capped AuNPs collected by centrifugation and vacuum drying.

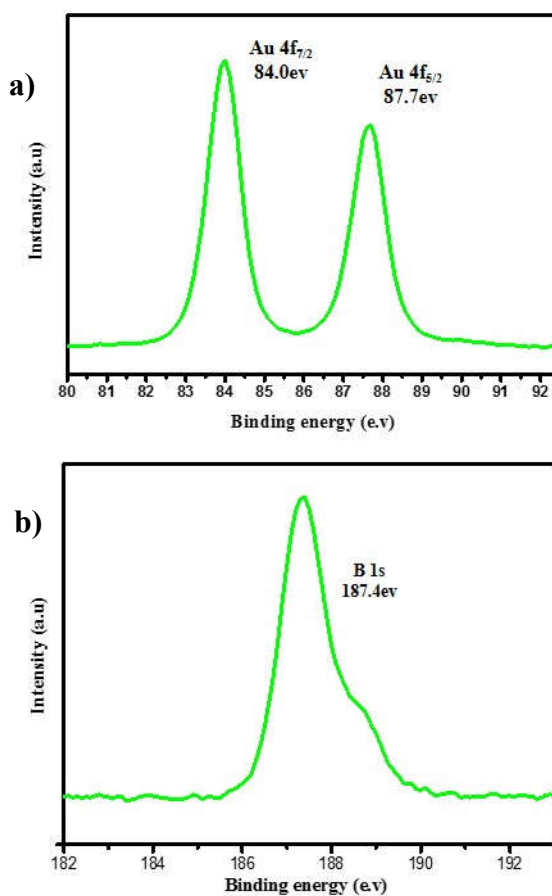

**Figure S9.** The XPS spectra of Au 4f core-level for AuNPs (a) and boron 1s core-level for  $[closo-B_{12}H_{12}]^{2-}$  (b).

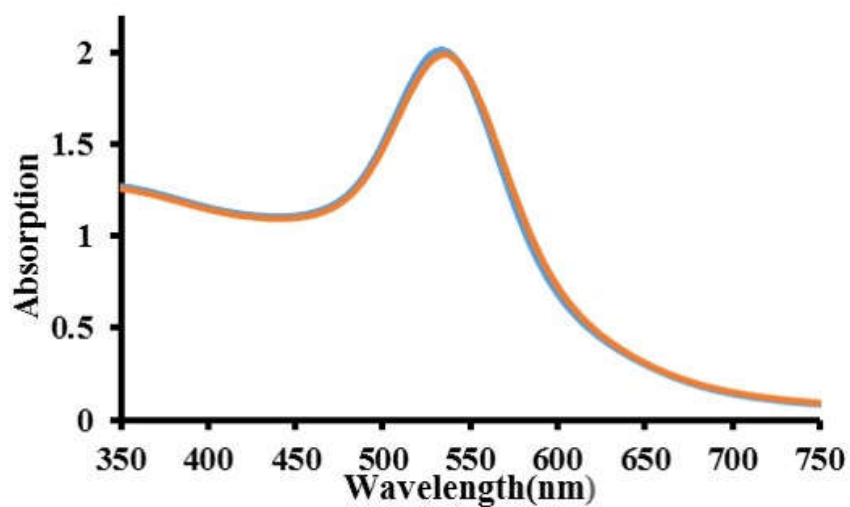

**Figure S10.** The UV-Vis spectra of gold nanoparticles: freshly prepared (red line) and kept for 3 months (blue line).

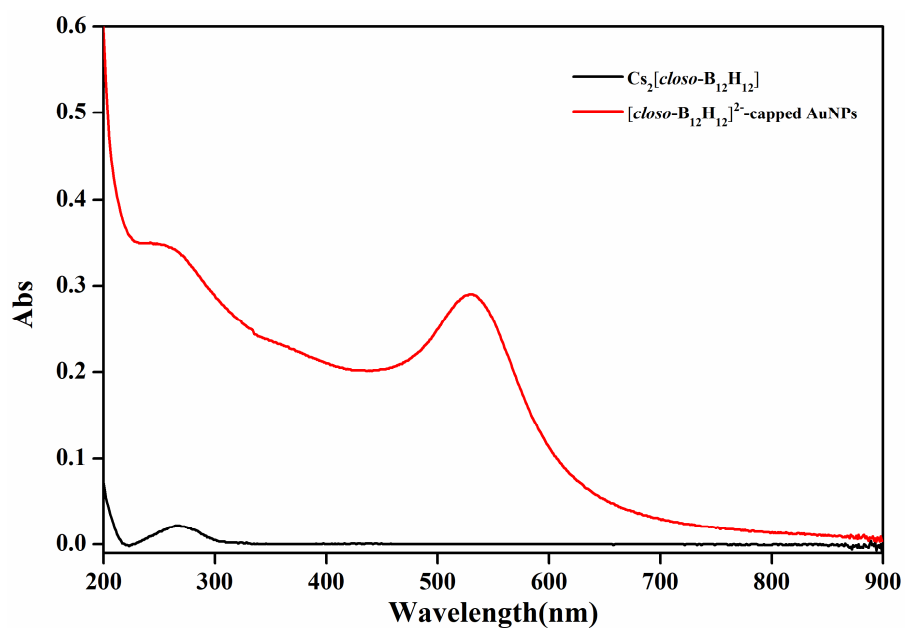

**Figure S11.** The UV-Vis spectra of  $\text{Cs}_2[\text{closo-B}_{12}\text{H}_{12}]$  and  $[\text{closo-B}_{12}\text{H}_{12}]^{2-}$ -capped AuNPs.

#### 4. Phase transfer of [*closo*-B<sub>12</sub>H<sub>12</sub>]<sup>2-</sup>-capped Au nanoparticles via exchanging cations of boron clusters

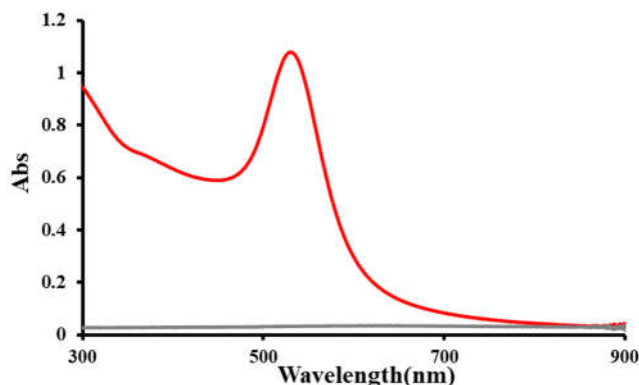

**Figure S12.** UV/Vis absorption spectra of [*closo*-B<sub>12</sub>H<sub>12</sub>]<sup>2-</sup>-capped AuNPs colloid aqueous solution before (red) and after (grey) the addition of tetrabutylammonium bromide (TBAB).

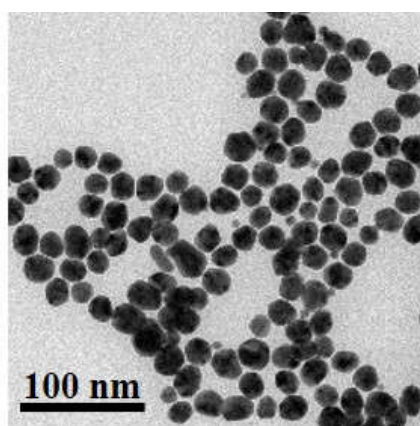

**Figure S13.** The TEM micrograph of the resulting organic solvent phase and the gold nanoparticles displayed no signs of degradation or aggregation.

#### 5. General procedures for Cr (III) and Pb (II) detection

**General procedures for metal ions detection:** a series of metal ions (5  $\mu$ M) were separately added to 6  $\mu$ M of label-free [*closo*-B<sub>12</sub>H<sub>12</sub>]<sup>2-</sup>-capped Au nanoparticles with an average of 15 nm in aqueous solution at pH 8.5 and 11. Before the addition of metal ions, 0.05 M NaCl was added to improve the sensitivity, which was expected to reduce the electrostatic repulsion among the negatively charged Au nanoparticles.<sup>[S1]</sup> The mixtures were then shaken by hand and determined by UV-vis spectrum after incubated at room temperature for 30 min. The pH of the solution was adjusted by addition of HCl (0.1 M) or NaOH (0.1 M) solution.



## 6. Analytical data of Cr (III) and Pb (II) detection based on $[closo-B_{12}H_{12}]^{2-}$ -capped AuNPs

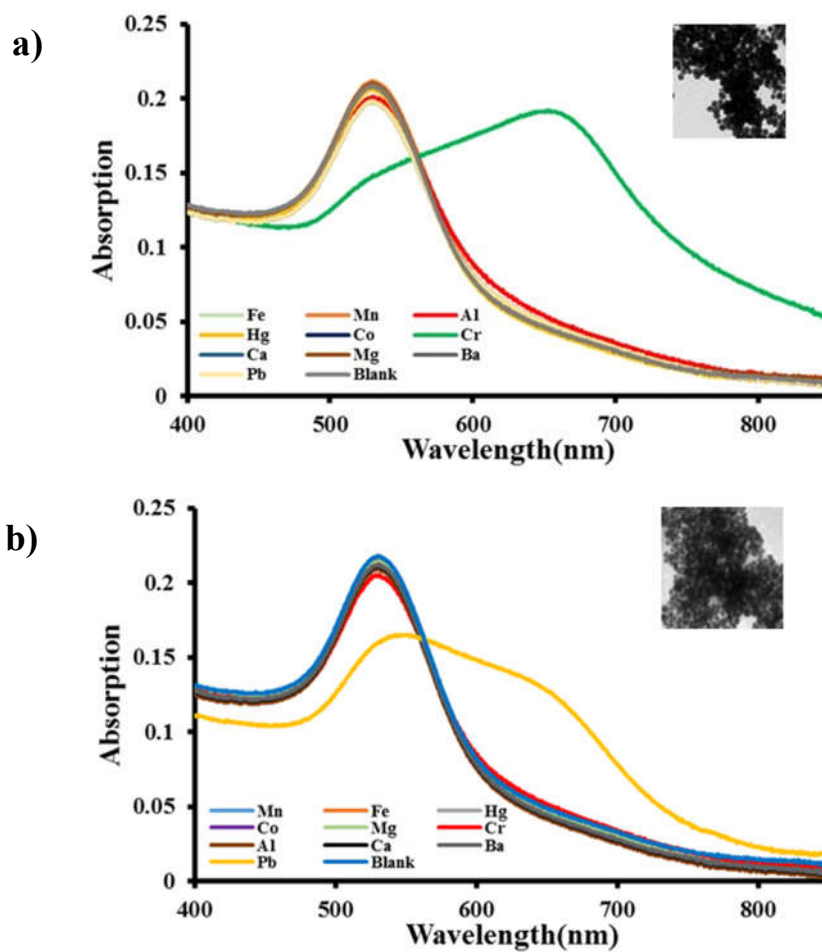

**Figure S14.** The UV-vis spectra of label-free Au decahedra after adding metal ions at different pH value of solution: (a) pH = 8.5 (inset: aggregated decahedral particles in the presence of  $Cr^{3+}$  ions); (b) pH = 11 (inset: aggregated decahedral particles in the presence of  $Pb^{2+}$  ions).

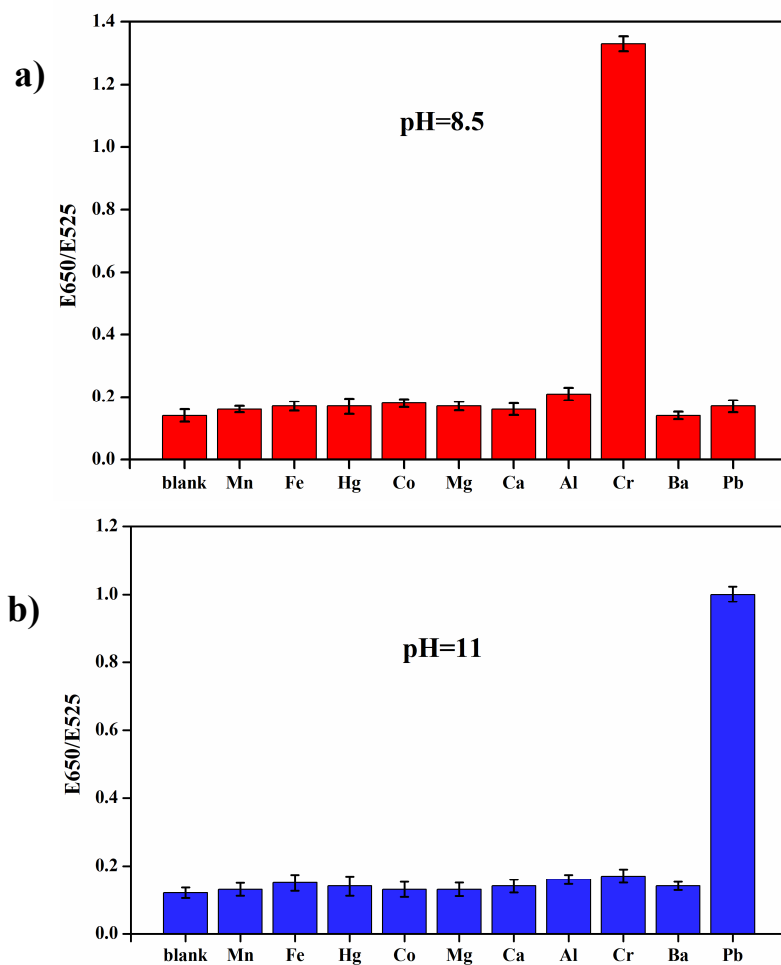

**Figure S15.** The extinctive ratios of intensity at 650 nm and 525 nm ( $E_{650}/E_{525}$ ) in the presence of 5  $\mu\text{M}$   $\text{Mn}^{2+}$ ,  $\text{Fe}^{3+}$ ,  $\text{Hg}^{2+}$ ,  $\text{Co}^{2+}$ ,  $\text{Mg}^{2+}$ ,  $\text{Ca}^{2+}$ ,  $\text{Al}^{3+}$ ,  $\text{Cr}^{3+}$ ,  $\text{Ba}^{2+}$  and  $\text{Pb}^{2+}$  ions at different pH value of solution with 0.05 M of NaCl: (a) pH=8.5; (b) pH=11.

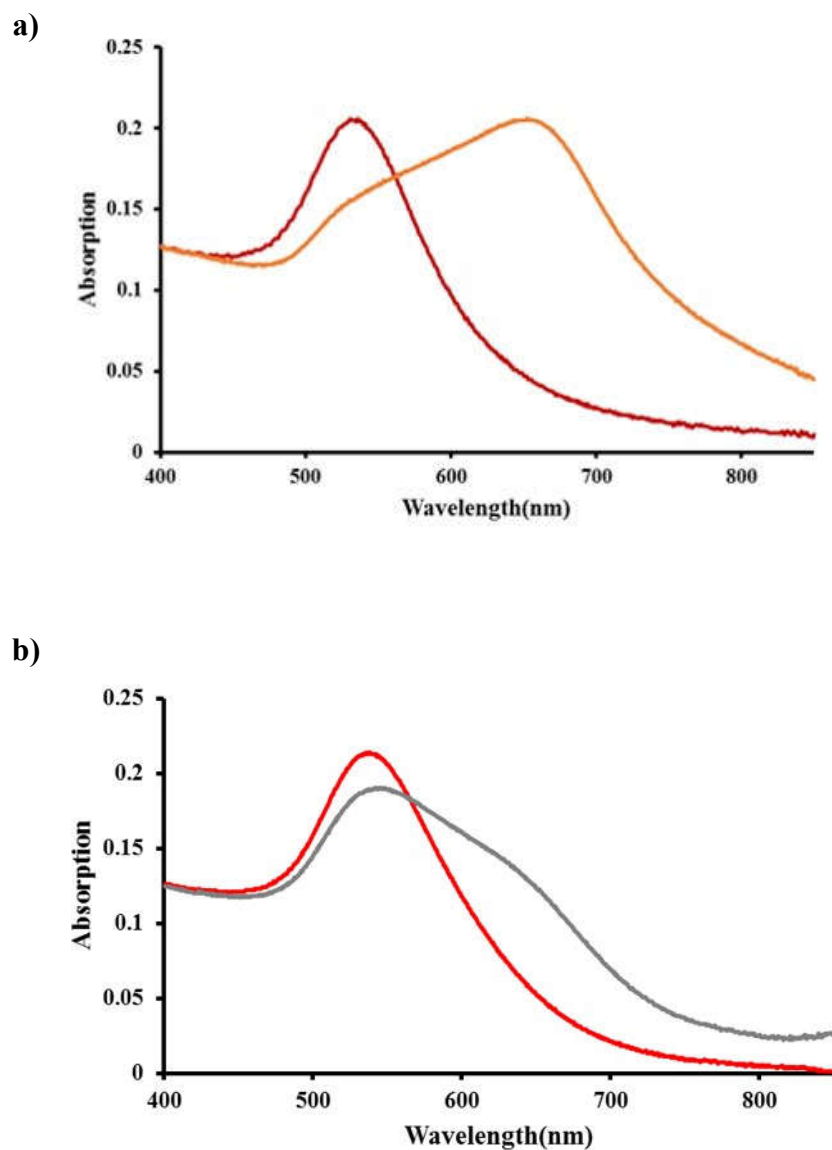

**Figure S16.** (a) The UV-Vis spectra of [closo-B<sub>12</sub>H<sub>12</sub>]<sup>2-</sup>-capped AuNPs for colloidal solutions containing (Mn<sup>2+</sup>, Fe<sup>3+</sup>, Hg<sup>2+</sup>, Co<sup>2+</sup>, Mg<sup>2+</sup>, Ca<sup>2+</sup>, Al<sup>3+</sup>, Ba<sup>2+</sup> and Pb<sup>2+</sup>) with (yellow line) and without (red line) Cr<sup>3+</sup> at pH value of 8.5 with 0.05 M NaCl. (b) The UV-Vis spectra of [closo-B<sub>12</sub>H<sub>12</sub>]<sup>2-</sup>-capped AuNPs for colloidal solutions containing (Mn<sup>2+</sup>, Fe<sup>3+</sup>, Hg<sup>2+</sup>, Co<sup>2+</sup>, Mg<sup>2+</sup>, Ca<sup>2+</sup>, Al<sup>3+</sup>, Cr<sup>3+</sup> and Ba<sup>2+</sup>) with (gray line) and without (red line) Pb<sup>2+</sup> at pH value of 11 with 0.05 M NaCl. The concentration of each metal ion was 1  $\mu$ M.

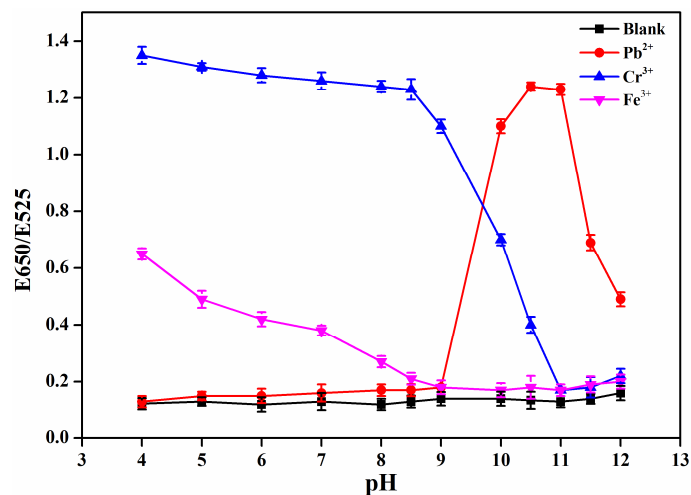

**Figure S17.** The extinctive ratios of intensity at 650 nm and 525 nm (E676/E520) in the presence of 50  $\mu\text{M}$   $\text{Pb}^{2+}$ ,  $\text{Cr}^{3+}$  and  $\text{Fe}^{3+}$  ions versus pH value.

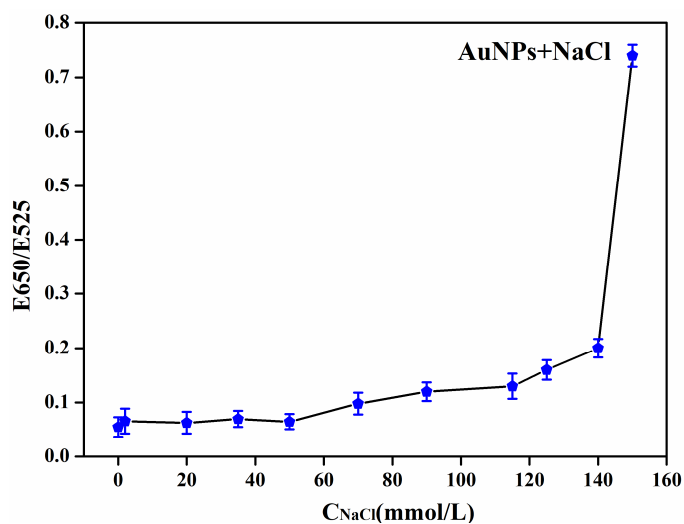

**Figure S18.** Plot of extinction ratio (E650/E525) versus the amount of NaCl.

## 7. [*closo*- $\text{B}_{12}\text{H}_{12}$ ] $^{2-}$ -capped PtNPs and [*closo*- $\text{B}_{12}\text{H}_{12}$ ] $^{2-}$ -capped AgNPs

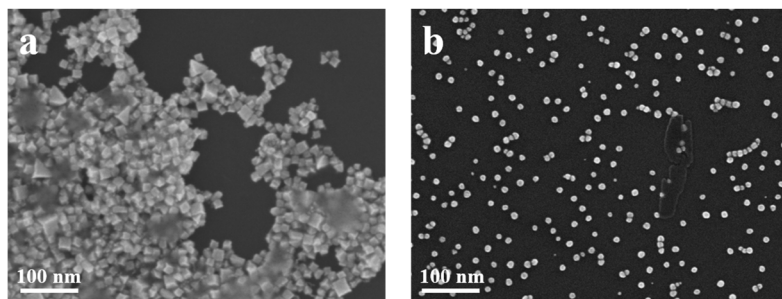

**Figure S19.** SEM images of (a) Pt nano-cubes and (b) sphere-like Ag nanoparticles prepared by means of the chemical reduction of metal salt precursor in an aqueous system, where  $\text{Cs}_2[\text{closo-B}_{12}\text{H}_{12}]$  was used both as an efficient reductant and stabilizer. These works are ongoing in our lab.

## 8. List of methods of colorimetric detection of Pb<sup>2+</sup> and Cr<sup>3+</sup>

**Table S1.** List of methods of colorimetric detection of Pb<sup>2+</sup> and Cr<sup>3+</sup>

| Target           | Probe            | Readout             | LOD/ $\mu$ M | Ref. |
|------------------|------------------|---------------------|--------------|------|
| Pb <sup>2+</sup> | DNA-AuNPs        | Colorimetric/UV-vis | 0.1          | 2    |
|                  | DNAzyme-AuNPs    | Colorimetric        | 0.5          | 3    |
|                  | GA-AuNPs         | Colorimetric/UV-vis | 5            | 4    |
|                  | MUA-AuNPs        | Colorimetric/UV-vis | 10           | 5    |
|                  | <b>this work</b> | Colorimetric/UV-vis | <b>0.02</b>  | /    |
| Cr <sup>3+</sup> | DTNBA-AuNPs      | Colorimetric/UV-vis | 1.8          | 6    |
|                  | NTP-AuNPs        | Colorimetric/UV-vis | 1.4          | 7    |
|                  | DMSA-AuNPs       | Colorimetric/UV-vis | 0.01         | 8    |
|                  | <b>this work</b> | Colorimetric/UV-vis | <b>0.005</b> | /    |

## 9. References

- [1] J. Guan, W. S. Yang, *Colloids and Surfaces A: Physicochem. Eng. Aspects*, **2008**, 325, 194–197.
- [2] J. W. Liu, Y. Lu, *J. Am. Chem. Soc.*, 2004, **126**, 12298–12305.
- [3] D. Mazumdar, J. W. Liu, G. Lu, J. Z Zhou, Y. Lu, *Chem. Commun.*, 2010, **46**, 1416–1418.
- [4] K. Yoosaf, B. I. Ipe, C. H. Suresh, K. G. Thomas, *J. Phys. Chem. C*, 2007, **111**, 12839–12847.
- [5] C. H. Fan, S. J. He, G. Liu, L. H. Wang, S. P. Song, *Sensors*, 2012, **12**, 9467-9475.
- [6] Y. Q. Dang, H. W. Li, B. Wang, L. Li, Y. Q. Wu, *ACS Appl. Mater. Interfaces*, 2009, **1**, 1533–1538.
- [7] Y. C. Chen, I. L. Lee, Y. M. Sung, S. P. Wu, *Sens. Actuators, B*, 2013, **188**, 354-359.
- [8] W. W. Chen, Z. Wang, K. Deng, X. Y. Jiang, *Nanoscale*, 2015, **7**, 2042–2049.
